# Supplementary material for: Leucine-rich a-2 glycoprotein as a potential biomarker of idiopathic multicentric Castleman disease with pulmonary involvement: a single-center case-control study from Japan
Source: PubMed Central journal article supplement — J Thorac Dis. 2022 May;14(5):1332–41. doi: 10.21037/jtd-21-1973 (PMC9186224; doi:10.21037/jtd-21-1973), 2022-05
Supplement: jtd-14-05-1332-dss.pdf [file jtd-14-05-1332-dss.pdf]

## Data Sharing Statement

|                     |                                                                                                                                                    |                                                                                                                  |
|---------------------|----------------------------------------------------------------------------------------------------------------------------------------------------|------------------------------------------------------------------------------------------------------------------|
| <b>Article Info</b> | https://dx.doi.org/10.21037/jtd-21-1973                                                                                                            |                                                                                                                  |
| <b>Item</b>         | <b>Question</b>                                                                                                                                    | <b>Authors' Response<br/>(place "-" if not applicable)</b>                                                       |
| 1                   | Would you like to share data collected for your study to others?                                                                                   | Yes.                                                                                                             |
| 2                   | If not, would you like to share the reason for your decision?                                                                                      | -                                                                                                                |
| 3                   | What data in particular will be shared?                                                                                                            | Raw data which were evaluated in this study.                                                                     |
| 4                   | Any other documents will be share? Such as study protocol, statistical analysis plan, informed consent form, clinical study report, analytic code. | No.                                                                                                              |
| 5                   | When will data availability begin?                                                                                                                 | From the publication date.                                                                                       |
| 6                   | When will data availability end?                                                                                                                   | One years within the publication date, since the technique may be updated over time.                             |
| 7                   | To whom will you share the data?                                                                                                                   | Respirologist who contact to corresponding author by e-mail.                                                     |
| 8                   | For what type of analysis or purpose?                                                                                                              | For analysis to investigate the utility of LRG for idiopathic Multicentric Castleman Disesase.                   |
| 9                   | How or where can the data/documents be obtained?                                                                                                   | Emails could be sent to the address below to obtain the shared data:<br>sotakata@imed3.med.osaka-u.ac.jp         |
| 10                  | Any other restrictions?                                                                                                                            | We may balance the potential benefits and risks for each request and then provide the data that could be shared. |
