# Supplementary material for: Leucine-rich a-2 glycoprotein as a potential biomarker of idiopathic multicentric Castleman disease with pulmonary involvement: a single-center case-control study from Japan
Source: PubMed Central journal article supplement — J Thorac Dis. 2022 May;14(5):1332–41. doi: 10.21037/jtd-21-1973 (PMC9186224; doi:10.21037/jtd-21-1973), 2022-05
Supplement: jtd-14-05-1332-supplementary.pdf [file jtd-14-05-1332-supplementary.pdf]

## The detail of histological findings, baseline chest imaging, and comprehensive pulmonary function test of each patient

### No. 1

Histological findings:

A biopsy specimen of the upper and lower lobe of the left lung presented lymph follicle formation and infiltration of lymphoplasmacytic cells in the alveolar interstitium and bronchovascular bundle. A mediastinal lymph node sample presented plasmacytosis in the interfollicular space, and the infiltrated plasma cells did not present deviation of  $\kappa / \lambda$  ratio by light chain in situ hybridization (ISH).

Chest imaging at baseline:

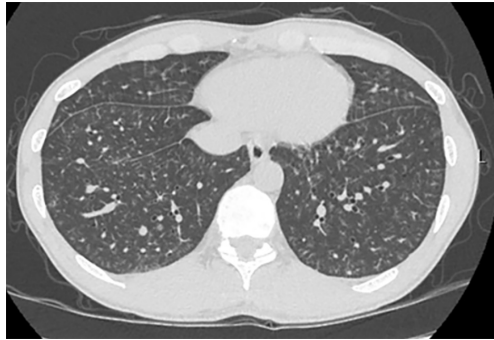

Diffuse ground-glass opacity and interlobular septal thickening were found.

Pulmonary function test. (at baseline)

|                      |      |
|----------------------|------|
| VC (L)               | 3.97 |
| VC % predicted (%)   | 87   |
| FEV1.0 (L)           | 8.46 |
| FEV1.0% (%)          | 89.9 |
| DLco % predicted (%) | 79.6 |

VC, Vital capacity; FEV, Forced expiratory volume in one second; DLco, diffusing capacity of lung for carbon monoxide.

**No. 2**

Histological findings:

A biopsy specimen of the middle and lower lobe of the right lung revealed infiltration of lymphocytes and plasma cells. Fibrotic interstitial change and developing germinal center were partly shown. IgG4<sup>+</sup>/IgG<sup>+</sup> ratio was not too high, although staining was weak.

Chest imaging at baseline:

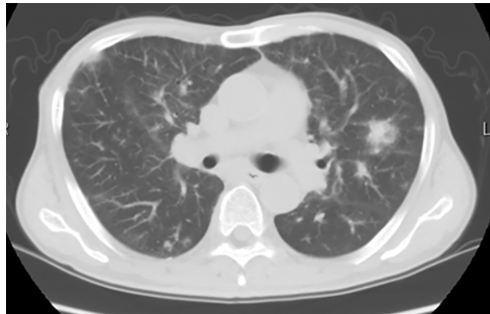

Patchy shadow and diffuse ground-glass opacity were shown.

| Pulmonary function test. (at baseline) |      |
|----------------------------------------|------|
| VC (L)                                 | 2.55 |
| VC % predicted (%)                     | 74.5 |
| FEV1.0 (L)                             | 2.08 |
| FEV1.0% (%)                            | 76.4 |
| DLco % predicted (%)                   | 77.2 |

**No. 3**

Histological findings:

A mediastinal lymph node biopsy specimen revealed plasmacytosis in the interfollicular space. IgG4<sup>+</sup>/IgG<sup>+</sup> ratio was approximately 20%.

Chest imaging at baseline:

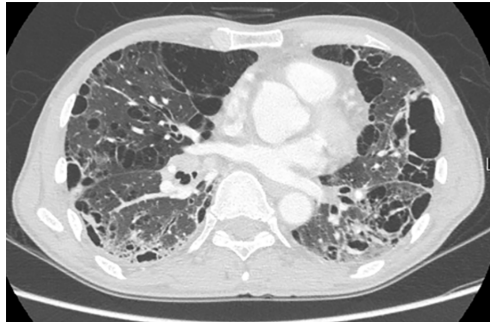

Multiple cystic changes and reticular and ground-glass opacities were shown in the predominantly bilateral lower lobes of the lungs.

Pulmonary function test. (at baseline)

|                      |      |
|----------------------|------|
| VC (L)               | 2.76 |
| VC % predicted (%)   | 65.4 |
| FEV1.0 (L)           | 1.90 |
| FEV1.0% (%)          | 69.6 |
| DLco % predicted (%) | 34.2 |

**No. 4**

Histological findings:

A biopsy specimen of the upper and lower lobe of the right lung revealed aggregation of small lymphoid cells around the bronchiole. The infiltration of plasma cells was shown. IgG4<sup>+</sup>/IgG<sup>+</sup> ratio was approximately 10%.

Chest imaging at baseline:

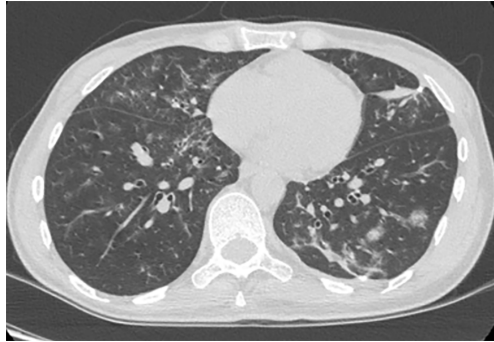

Diffuse ground-glass opacities were shown.

Pulmonary function test. (at baseline)

|                      |      |
|----------------------|------|
| VC (L)               | 2.54 |
| VC % predicted (%)   | 79.1 |
| FEV1.0 (L)           | 1.56 |
| FEV1.0% (%)          | 64.5 |
| DLco % predicted (%) | 77.7 |

**No. 5**

Histological findings:

A biopsy specimen of the upper and lower lobe of the left lung revealed the infiltration of plasma cells in the alveolar interstitium. IgG4<sup>+</sup>/IgG<sup>+</sup> ratio was approximately 20% and 50% in lung and mediastinal lymph node specimens, respectively.

Chest imaging at baseline:

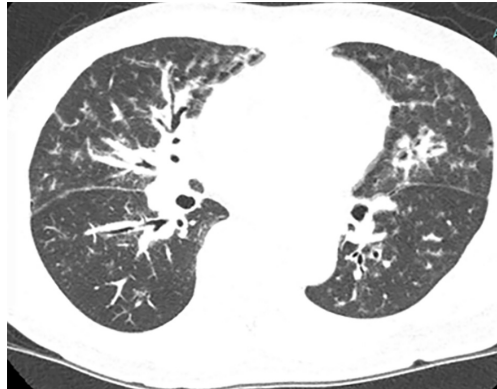

Diffuse ground-glass opacities and thickened bronchovascular bundles were shown.

| Pulmonary function test. (at baseline) |      |
|----------------------------------------|------|
| VC (L)                                 | 3.61 |
| VC % predicted (%)                     | 89.5 |
| FEV1.0 (L)                             | 2.75 |
| FEV1.0% (%)                            | 76.8 |
| DLco % predicted (%)                   | 91.4 |

**Table S1** Changes of imaging findings of the lung and symptoms before and after treatment

| Patient No | Change of image findings of lung                                  | Change of symptom                               |
|------------|-------------------------------------------------------------------|-------------------------------------------------|
| No. 1      | Multi cystic change appeared. Ground grass opacity improved.      | Fever and dyspnea on exertion improved.         |
| No. 2      | Ground glass opacity partially improved and partially progressed. | No symptom at first visit and no change.        |
| No. 3      | Multi cystic change progressed.                                   | Dyspnea on exertion and cough were not changed. |
| No. 4      | Ground glass opacity partially improved.                          | Fever and fatigue improved.                     |
| No. 5      | Ground glass opacity were not changed.                            | Dyspnea on exertion was not changed.            |

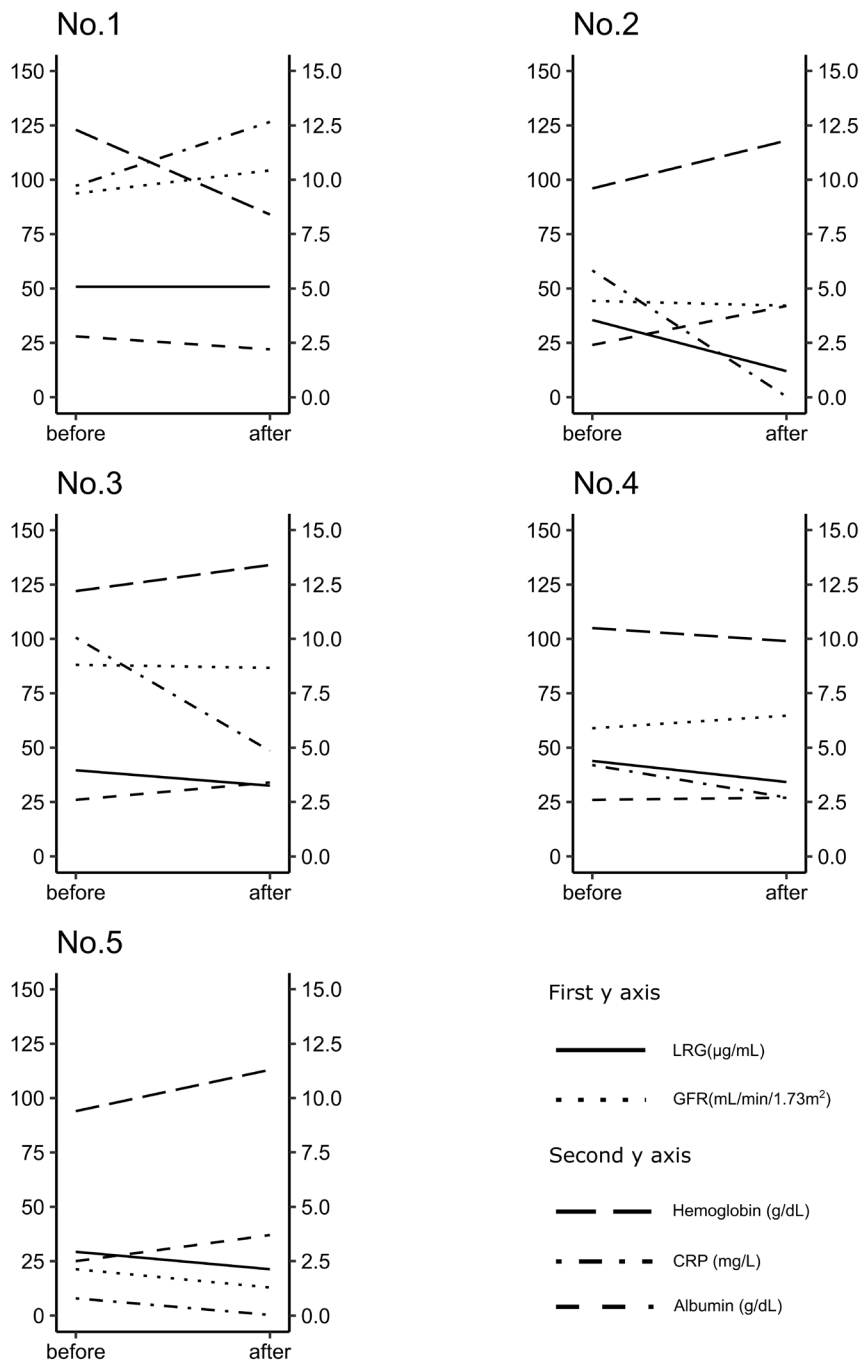

**Figure S1** Biochemical findings before and after treatment. LRG tended to correlate with biochemical values such as hemoglobin, albumin, and CRP.

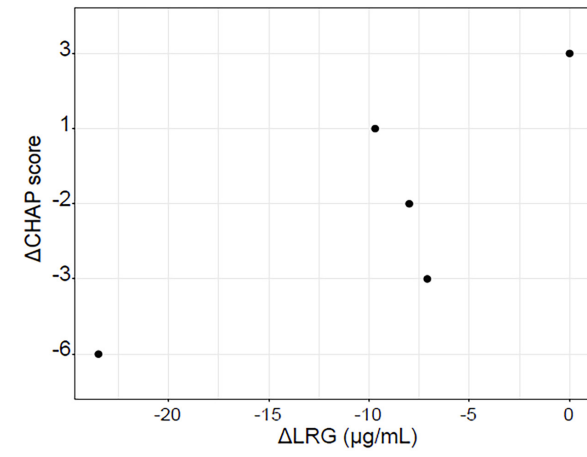

**Figure S2** Correlation of  $\Delta$ LRG and  $\Delta$ CHAP score. The  $\Delta$ LRG tended to correlate with  $\Delta$ CHAP score, although not statistically significant due to the small sample size. (Polyserial correlation coefficient = 0.8795, P value = 0.7818).

**Table S2** Cytokine and chemokine quantification

|                               | CXCL1        | CXCL9       | CXCL11      | IL-10    | MIP-1 $\alpha$ | ENA-78        | MIP-1 $\beta$ | MIP-3 $\alpha$ | Eotaxin      | IL-8           | CXCL10     | MCP-1          | TARC          | APRIL             | BAFF            | IL-6       | IL-17A     | IFN- $\gamma$ | IL-2         | IL-4       | IL-12p70    | IL-13      | sCD40L           | TNF- $\alpha$ | TNF- $\beta$ |
|-------------------------------|--------------|-------------|-------------|----------|----------------|---------------|---------------|----------------|--------------|----------------|------------|----------------|---------------|-------------------|-----------------|------------|------------|---------------|--------------|------------|-------------|------------|------------------|---------------|--------------|
| MCD                           | 193.2        | 142         | 60.3        | 15.5     | 343.1          | 423.5         | 35.3          | 38.5           | 153.6        | 219.5          | 64.4       | 316.6          | 251.3         | 13401.5           | 2849.6          | 67.2       | 19.1       | 2.5           | 68.3         | 38.8       | 49          | 10.9       | 10556.3          | 66.4          | 52.7         |
| (n=5)                         | (182.3–255)  | (70–380.6)  | (32.3–2305) | (2–24.3) | (153.6–536.6)  | (202.8–542.8) | (21–83.8)     | (19.3–86.1)    | (65.4–12000) | (94.3–1409.4)  | (55.3–178) | (166.6–1542.3) | (115–287.3)   | (12353.6–15520.3) | (1562.2–3812.5) | (47.7–633) | (3.6–34.9) | (2.5–26.1)    | (22.5–249.9) | (6.4–77.9) | (45.1–56.3) | (4.8–43.9) | (3499.3–16400.3) | (3.4–235.4)   | (21.9–319.9) |
| Control                       | 96.6         | 64.6        | 18.9        | 2        | 112.5          | 227.3         | 86.5          | 35.9           | 75.2         | 1035           | 93.8       | 229.6          | 196.6         | 11681.1           | 1838.8          | 25.6       | 3.6        | 2.5           | 22.5         | 10.5       | 35.7        | 13.4       | 12959.4          | 16.7          | 106.9        |
| (n=3)                         | (83.8–155.9) | (55.2–64.7) | (15.6–19.6) | (2–4.1)  | (60.5–287.7)   | (178.2–355.1) | (18.5–115.7)  | (33.9–47.8)    | (25.4–85.5)  | (174.9–1109.6) | (91–94.3)  | (189.6–379.3)  | (147.7–536.5) | (10101.9–11765.2) | (1552.1–2878.6) | (4.5–88.2) | (3.6–14.9) | (2.5–15.9)    | (22.5–22.5)  | (3.6–34.1) | (26.1–60)   | (4.8–20.6) | (9708–17445.1)   | (15.8–78.4)   | (95.4–315.4) |
| p-value<br>(permutation test) | 0.03571      | 0.03571     | 0.03571     | 0.1429   | 0.07143        | 0.25          | 0.5714        | 0.5714         | 0.3929       | 1              | 0.7857     | 1              | 0.7857        | 0.03571           | 0.3929          | 0.25       | 0.2321     | 0.6429        | 0.2857       | 0.1429     | 0.5714      | 0.7857     | 0.5714           | 0.5714        | 0.5714       |

MCD, multicentric Castleman disease; IL, interleukin; MIP, macrophage inflammatory protein; MCP, monocyte chemoattractant protein; APRIL, a proliferation-inducing ligand; IFN, interferon; TNF, tumor necrosis factor
